# Supplementary material for: Metagenomic Identification of a Novel Salt Tolerance Gene from the Human Gut Microbiome Which Encodes a Membrane Protein with Homology to a brp/blh-Family β-Carotene 15,15′-Monooxygenase
Source: PLOS journal article supplement (doi:10.1371/journal.pone.0103318), 2014-07-24
Supplement: S1 (10.1371/journal.pone.0103318.s001) [file journal.pone.0103318.s001.PDF]

|                             |                                                                                                                                                                                                                                                                                                                                                                           |
|-----------------------------|---------------------------------------------------------------------------------------------------------------------------------------------------------------------------------------------------------------------------------------------------------------------------------------------------------------------------------------------------------------------------|
| Title                       | Metagenomic identification of a novel salt tolerance gene from the human gut microbiome which encodes a membrane protein with homology to a brp/blh-family $\beta$ -carotene 15,15'-monooxygenase                                                                                                                                                                         |
| Authors                     | Culligan, Eamonn P.;Sleator, Roy D.;Marchesi, Julian R.;Hill, Colin                                                                                                                                                                                                                                                                                                       |
| Publication date            | 2014                                                                                                                                                                                                                                                                                                                                                                      |
| Original Citation           | Culligan EP, Sleator RD, Marchesi JR, Hill C (2014) Metagenomic Identification of a Novel Salt Tolerance Gene from the Human Gut Microbiome Which Encodes a Membrane Protein with Homology to a brp/blh-Family $\beta$ -Carotene 15,15#-Monooxygenase. PLoS ONE 9(7): e103318. doi:10.1371/journal.pone.0103318                                                           |
| Type of publication         | Article (peer-reviewed)                                                                                                                                                                                                                                                                                                                                                   |
| Link to publisher's version | 10.1371/journal.pone.0103318                                                                                                                                                                                                                                                                                                                                              |
| Rights                      | © 2015 Culligan et al. This is an open access article distributed under the terms of the Creative Commons Attribution License, which permits unrestricted use, distribution, and reproduction in any medium, provided the original author and source are credited - <a href="http://creativecommons.org/licenses/by/4.0/">http://creativecommons.org/licenses/by/4.0/</a> |
| Download date               | 2024-04-23 06:34:14                                                                                                                                                                                                                                                                                                                                                       |
| Item downloaded from        | <a href="https://hdl.handle.net/10468/2331">https://hdl.handle.net/10468/2331</a>                                                                                                                                                                                                                                                                                         |

**Figure S1. Growth in LB and LB + 7% NaCl**

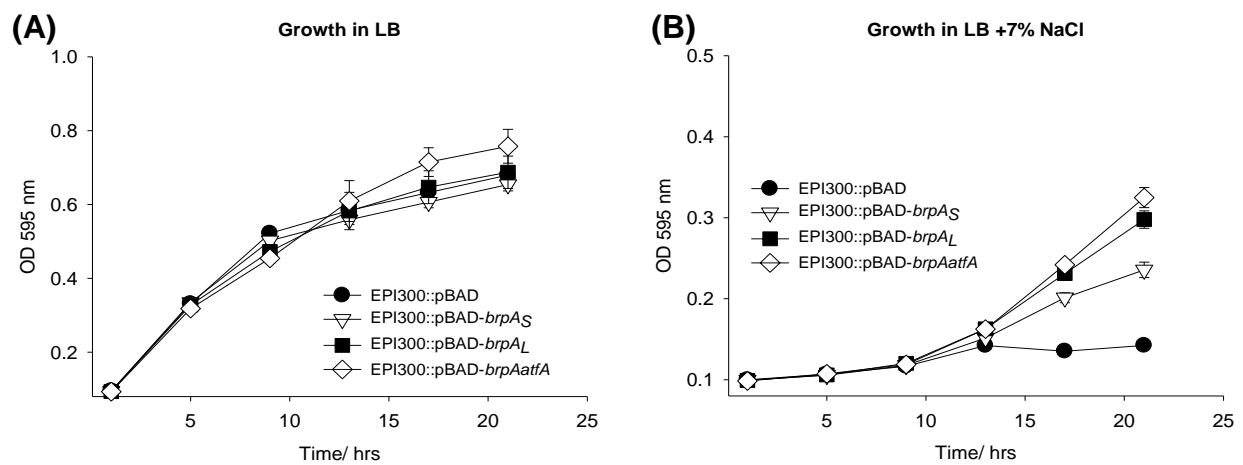

**Figure S1.** Growth of *E. coli* EPI300::pBAD and EPI300::pBAD-*brpAS* ( $P = 0.0008$ ), EPI300::pBAD-*brpAL* ( $P = 0.0002$ ) and EPI300::pBAD-*brpAatfA* ( $P = 0.0001$ ) in **(A)** LB broth and **(B)** LB broth supplemented with 7% NaCl. All three strains had a statistically significant increased salt tolerance compared to EPI300 carrying an empty copy of the pBAD vector. Numbers in parentheses indicate significant  $P$  values (unpaired student t-test). All values are the average of triplicate experiments and error bars are representative of the standard error of the mean (SEM).
